# Supplementary material
Source: MDPI journal article supplement (https://www.mdpi.com/1424-8247/15/8/987)
Supplement: s1 [file s1]

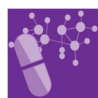

Supplementary material

# Phytochemical Composition and Cytoprotective Properties of the Endemic *Sideritis sipylea* Boiss Greek Species: A Valorization Study

Silvia Di Giacomo <sup>1</sup>, Antonella Di Sotto <sup>1,\*</sup>, Apostolis Angelis <sup>2</sup>, Ester Percaccio <sup>1</sup>, Annabella Vitalone <sup>1</sup>, Marco Gulli <sup>1</sup>, Alberto Macone <sup>3</sup>, Evangelos Axiotis <sup>2,4,†</sup> and Alexios Leandros Skaltsounis <sup>2,4,†</sup>

<sup>1</sup> Department of Physiology and Pharmacology “V. Erspamer”, Sapienza University of Rome, P.le Aldo Moro 5, 00185 Rome, Italy

<sup>2</sup> Department of Pharmacognosy and Natural Products Chemistry, Faculty of Pharmacy, National and Kapodistrian University of Athens, 15771 Athens, Greece

<sup>3</sup> Department of Biochemical Science “A. Rossi Fanelli”, Sapienza University of Rome, P.le Aldo Moro 5, 00185 Rome, Italy

<sup>4</sup> Natural Products Research Center “NatPro Aegean”, Gera, 81106 Lesvos, Greece

\* Correspondence: antonella.disotto@uniroma1.it

† These authors equally contributed to the work.

**Table S1.** *S. sipylea* methanolic enriched extract fractions of increased polarity in mass (g) and their % (w/w) yields.

| Fractions                         | Mass (g) | Yield (% w/w) |
|-----------------------------------|----------|---------------|
| DCM 100%                          | 0.0276   | 0.44          |
| DCM / EtOAc (10%)                 | 0.1636   | 2.64          |
| DCM / EtOAc (50%)                 | 0.2379   | 3.84          |
| EtOAc 100%                        | 0.3173   | 5.12          |
| EtOAc / MeOH (10%) ( <b>S10</b> ) | 0.9326   | <b>15.04</b>  |
| EtOAc / MeOH (20%) ( <b>S20</b> ) | 1.5671   | <b>25.27</b>  |
| EtOAc / MeOH (50%) ( <b>S50</b> ) | 1.4511   | <b>23.40</b>  |
| MeOH 100%                         | 0.2462   | 3.97          |

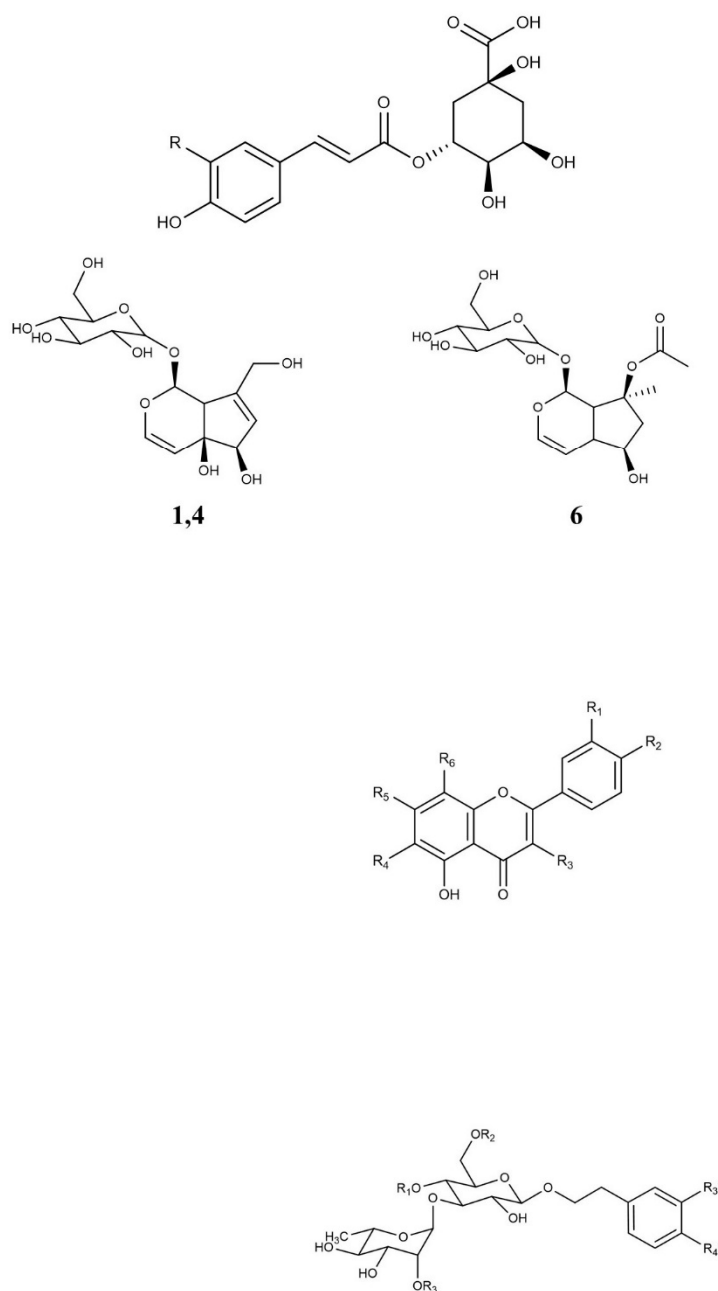

| Phenolic acids          | R                |
|-------------------------|------------------|
| Feruloylquinic acid (3) | OCH <sub>3</sub> |
| Chlorogenic acid (5)    | OH               |

| Iridoids                        |
|---------------------------------|
| Melittoside derivatives (1),(4) |
| Ajugoside (6)                   |

| Flavonoid                                                                                                                       | R <sub>1</sub> | R <sub>2</sub>   | R <sub>3</sub> | R <sub>4</sub>   | R <sub>5</sub>                                                                  | R <sub>6</sub>   |
|---------------------------------------------------------------------------------------------------------------------------------|----------------|------------------|----------------|------------------|---------------------------------------------------------------------------------|------------------|
| Apigenin (17)                                                                                                                   | H              | OH               | H              | H                | OH                                                                              | H                |
| Apigenin-7- <i>p</i> -coumaroyl-glucoside (16)                                                                                  | H              | OH               | H              | H                | <i>p</i> -coumaroyl-glu                                                         | H                |
| Apigenin-7- <i>O</i> -glucoside (11)                                                                                            | H              | OH               | H              | H                | <i>O</i> -glu                                                                   | H                |
| Isoscutellarein 7- <i>O</i> -allosyl-(1→2)-glucoside (12)                                                                       | H              | OH               | H              | H                | <i>O</i> -all-glu                                                               | OH               |
| Luteolin 7- <i>O</i> -allosyl-(1→2)-[6''- <i>O</i> -acetyl]-glucoside (13)                                                      | OH             | OH               | H              | H                | <i>O</i> -(6''- <i>O</i> -acetyl)-β-glu                                         | H                |
| 4'- <i>O</i> -methylisoscuteallarein 7- <i>O</i> -allosyl-(1→2)-glucoside (14)                                                  | H              | OCH <sub>3</sub> | H              | H                | <i>O</i> -all-glu                                                               | OH               |
| 4'- <i>O</i> -methylisoscuteallarein 7- <i>O</i> -allosyl-(1→2)-[6''- <i>O</i> -acetyl]-glucoside (15)                          | H              | OCH <sub>3</sub> | H              | H                | <i>O</i> -(6''- <i>O</i> -acetyl)-β-glu                                         | OH               |
| 4'- <i>O</i> -methylisoscuteallarein 7- <i>O</i> -[6'''- <i>O</i> -acetyl]-allosyl-(1→2)-[6''- <i>O</i> -acetyl]-glucoside (18) | H              | OCH <sub>3</sub> | H              | H                | <i>O</i> -(6'''- <i>O</i> -acetyl)-β-D-all-(1→2)] 6''- <i>O</i> -acetyl-β-D-glu | OH               |
| Xanthomicrol or Hypolaetin trimethyl ether (19)                                                                                 | H              | OH               | H              | OCH <sub>3</sub> | OCH <sub>3</sub>                                                                | OCH <sub>3</sub> |

| Phenylethanoid glycosides | R <sub>1</sub> | R <sub>2</sub> | R <sub>3</sub> | R <sub>4</sub> |
|---------------------------|----------------|----------------|----------------|----------------|
| Echinacoside (7)          | feru           | glc            | H              | OH             |
| Lavandulifolioside (8)    | caff.          | api            | api            | OH             |
| Isoverbacoside (9)        | H              | caff.          | H              | OH             |
| Leucoseptoside A (10)     | feru           | H              | H              | OH             |

\*feru = feruloyl; caff = caffeoyl; glc = glucose; api = apiose

**Figure S1.** Chemical structures of the identified compounds from S10, S20 and S50 fractions respectively from wild *S. sipylea* Boiss. The numbers in parentheses refer to Table 2 in the main manuscript.

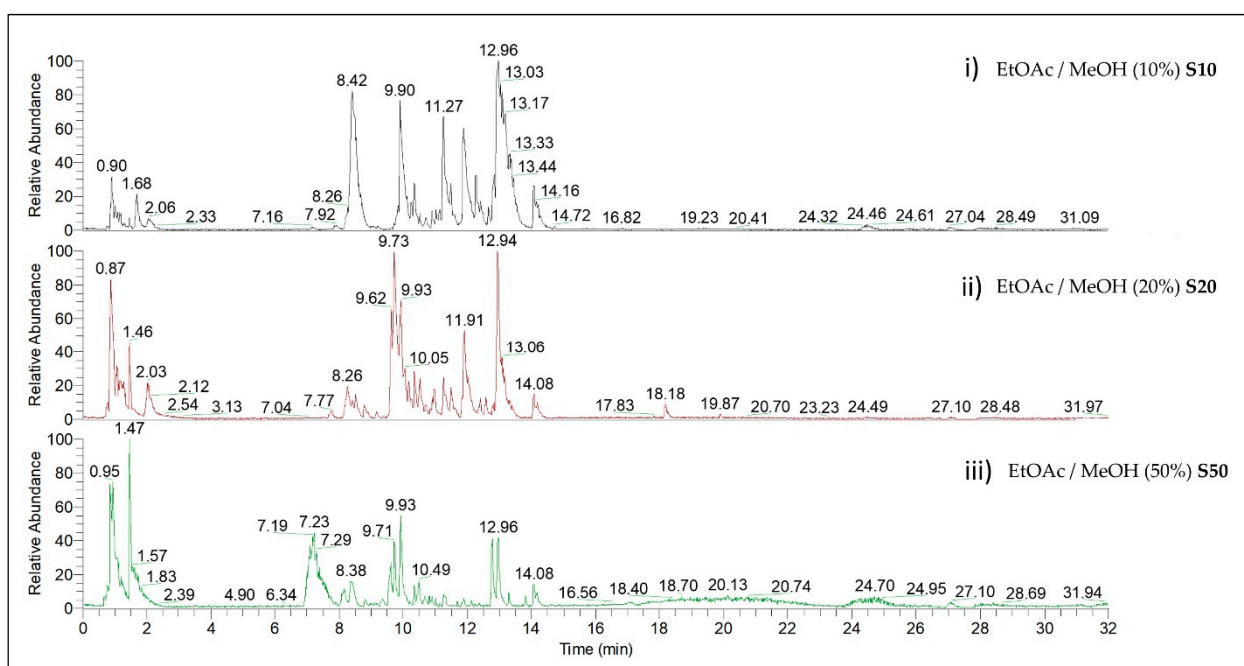

**Figure S2.** UPLC-ESI (-)-HRMS chromatograms of (i) EtOAc / MeOH (10%) (S10), (ii) EtOAc / MeOH (20%) (S20), and (iii) EtOAc / MeOH (50%) (S50) fractions of the methanol extract from wild *S. sipylea*

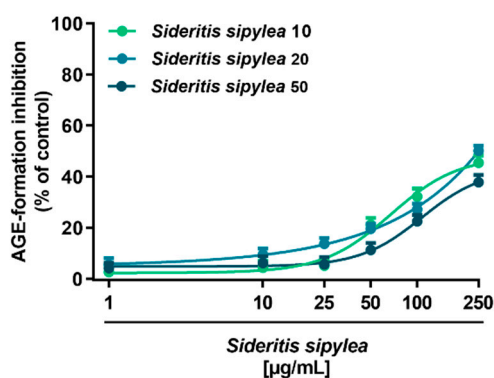

**Figure S3.** AGE formation inhibition by S10, S20 and S50 fractions from *S. sipylea* Boiss. Data represents the average and standard error of at least six replicates from at least two experiments.
